# Supplementary material for: Waves of actin and microtubule polymerization drive microtubule-based transport and neurite growth before single axon formation
Source: eLife journal article supplement (doi:10.7554/elife.12387), 2016-02-02
Supplement: supp [file elife-12387-supp-v1.zip]

Archive with 21 entries (21 files):
- elife_poa_e12387_Video_3.avi
- elife_poa_e12387_Video_4.avi
- elife_poa_e12387_Figure_3_figure_supplement_1.pdf
- elife_poa_e12387_Video_5.avi
- elife_poa_e12387_Figure_8_figure_supplement_1.pdf
- elife_poa_e12387_Video_6.avi
- elife_poa_e12387_Figure_1_figure_supplement_1.pdf
- elife_poa_e12387_Figure_1_figure_supplement_2.pdf
- elife_poa_e12387_Video_2.avi
- elife_poa_e12387_Figure_3_figure_supplement_3.pdf
- elife_poa_e12387_Video_1.avi
- elife_poa_e12387_Figure_2_figure_supplement_2.pdf
- elife_poa_e12387_Figure_6_figure_supplement_1.pdf
- elife_poa_e12387_Figure_3_figure_supplement_2.pdf
- elife_poa_e12387_Figure_6_figure_supplement_2.pdf
- elife_poa_e12387_Video_7.avi
- elife_poa_e12387_Figure_2_figure_supplement_3.pdf
- elife_poa_e12387_Video_8.avi
- elife_poa_e12387_Figure_7_figure_supplement_1.pdf
- elife_poa_e12387_Video_9.avi
- elife_poa_e12387_Figure_2_figure_supplement_1.pdf
