# Supplementary figures and images for: Waves of actin and microtubule polymerization drive microtubule-based transport and neurite growth before single axon formation
Source: eLife journal article supplement (doi:10.7554/elife.12387), 2016-02-02

Figure 3 - figure supplement 1. CA-KIF5C dynamic localization is dependent on microtubules

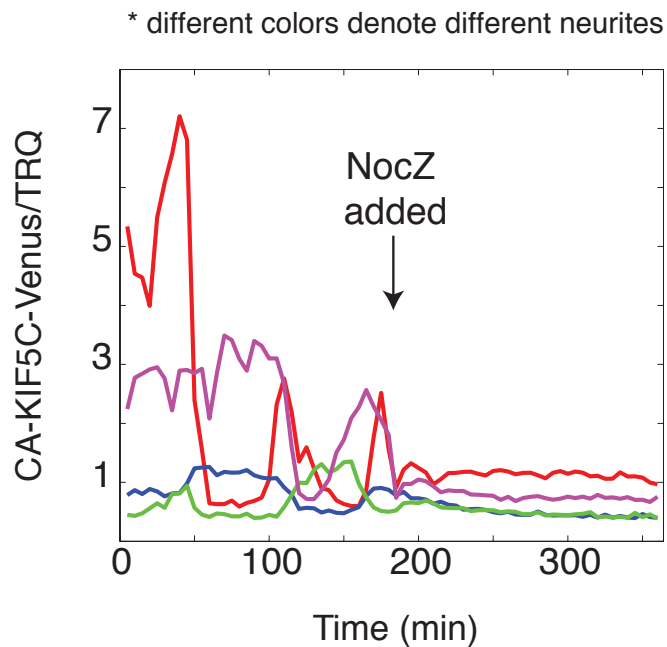

Supplement: supp [file elife-12387-supp-v1.zip]

Figure 6 - figure supplement 2. LatA treatment can cause neurite widening

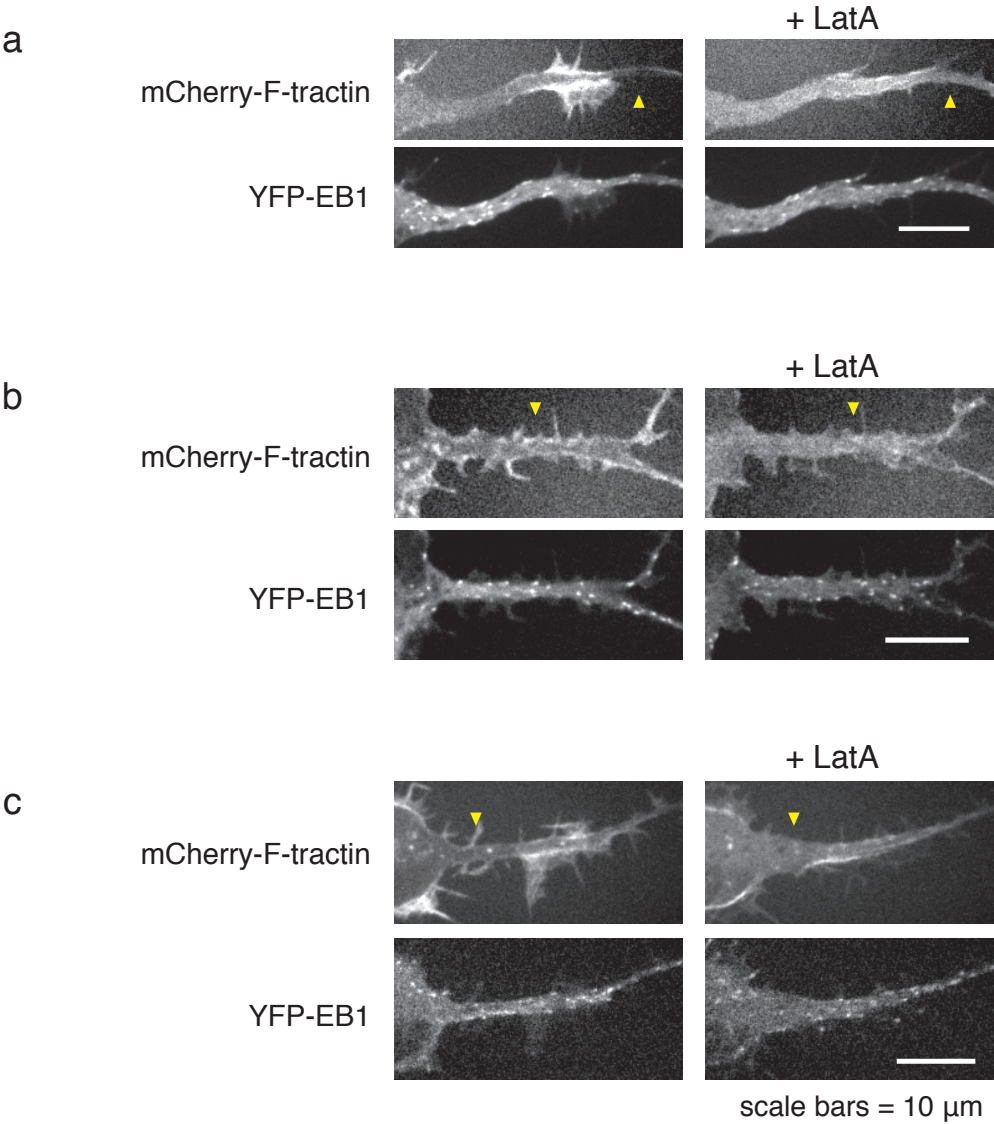

Supplement: supp [file elife-12387-supp-v1.zip]

Figure 3 - figure supplement 2. CA-KIF5C travels with actin waves

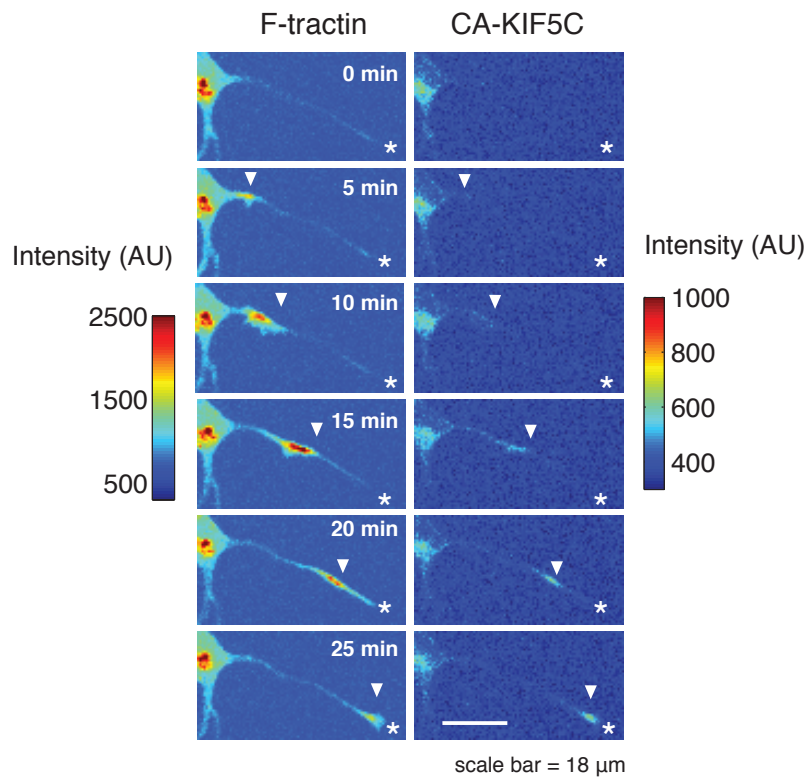

Supplement: supp [file elife-12387-supp-v1.zip]

Figure 6 - figure supplement 1. The difference in flow between windows 1 and 2 does not change over time

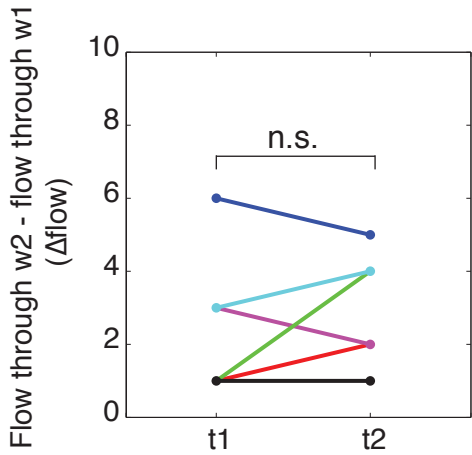

Supplement: supp [file elife-12387-supp-v1.zip]

Figure 7 - figure supplement 1. Activation of PA-Rac1 leads to neurite widening

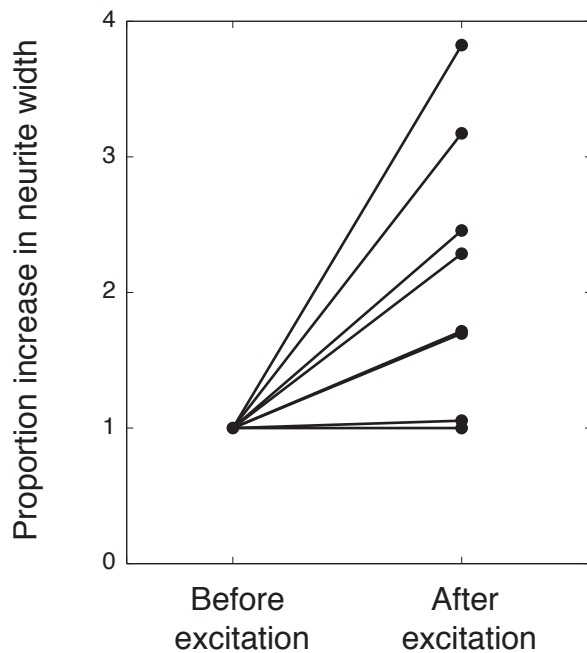

Supplement: supp [file elife-12387-supp-v1.zip]

Figure 8 - figure supplement 1. 50 nM Taxol can affect microtubule polymerization

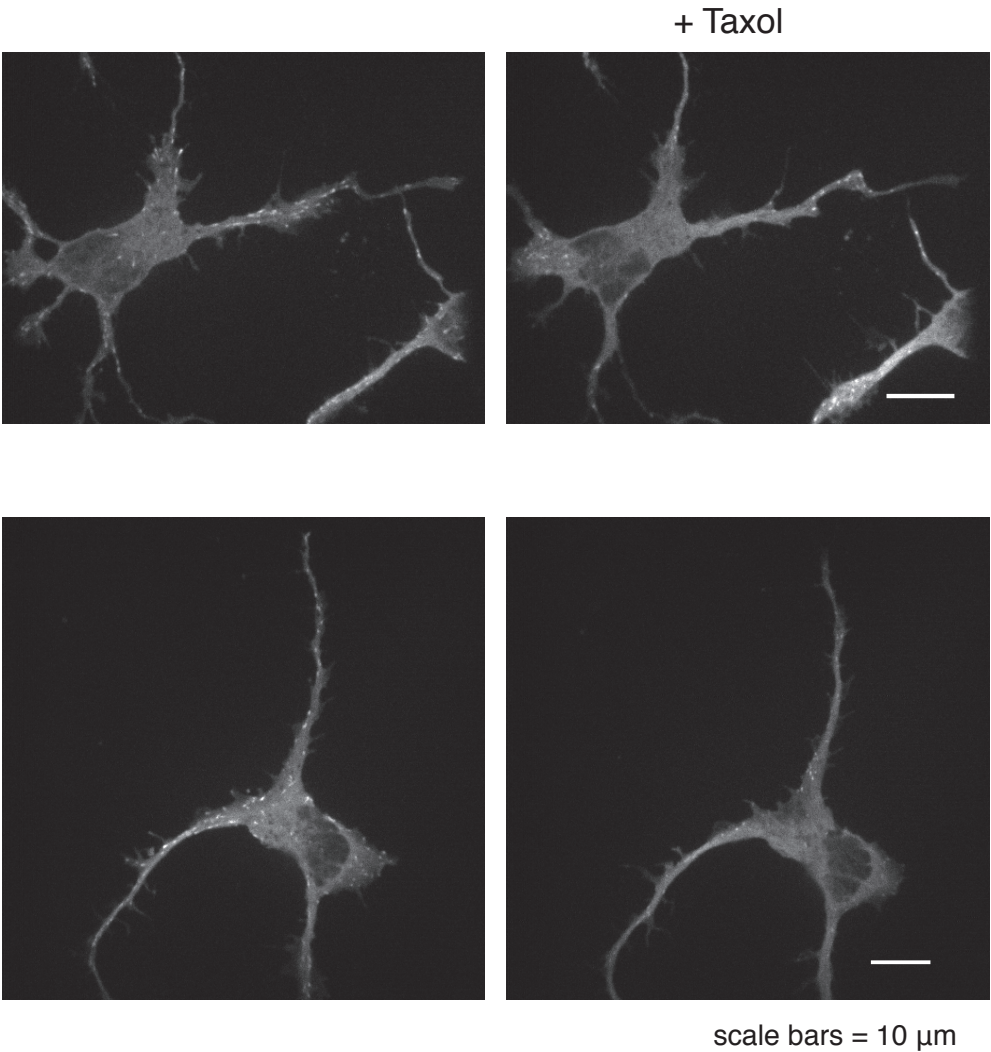

Supplement: supp [file elife-12387-supp-v1.zip › elife_poa_e12387_Figure_8_figure_supplement_1.pdf]

Figure 1 - figure supplement 1. Frequency of actin waves

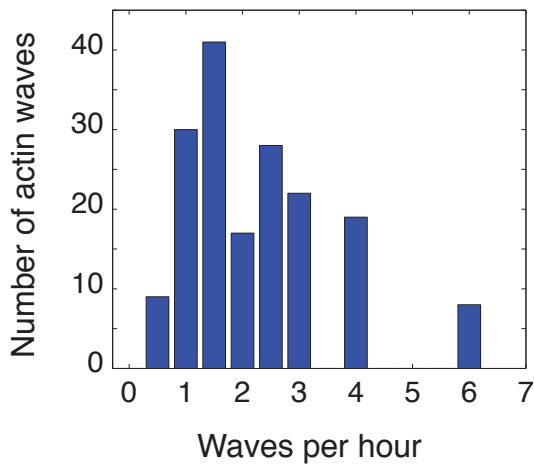

Supplement: supp [file elife-12387-supp-v1.zip › elife_poa_e12387_Figure_1_figure_supplement_1.pdf]

Figure 1 - figure supplement 2. Speed of actin waves

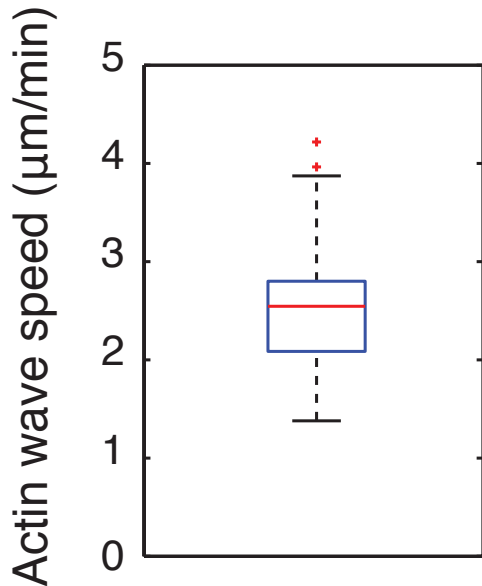

Supplement: supp [file elife-12387-supp-v1.zip › elife_poa_e12387_Figure_1_figure_supplement_2.pdf]

Figure 3 - figure supplement 3. Actin waves can reverse retrograde CA-KIF5C movement

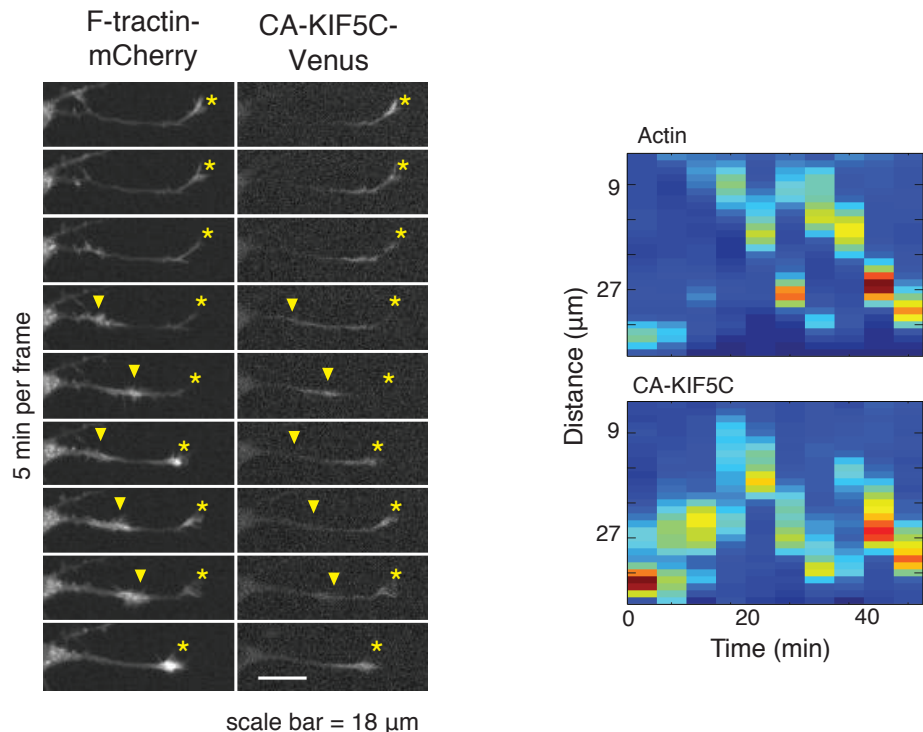

Supplement: supp [file elife-12387-supp-v1.zip › elife_poa_e12387_Figure_3_figure_supplement_3.pdf]

Figure 2 - figure supplement 2. Single microtubule enrichment behind actin wave

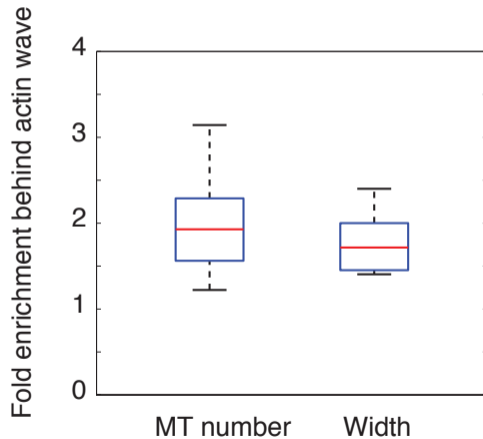

Supplement: supp [file elife-12387-supp-v1.zip › elife_poa_e12387_Figure_2_figure_supplement_2.pdf]

Figure 2 - figure supplement 3. EB1 puncta move in an anterograde fashion

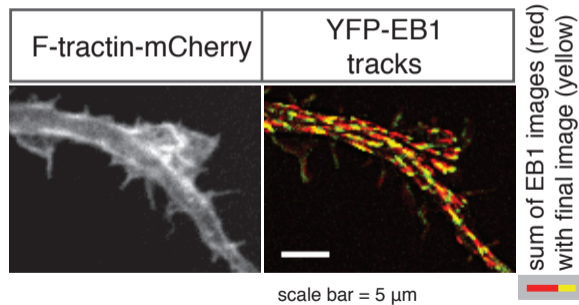

Supplement: supp [file elife-12387-supp-v1.zip › elife_poa_e12387_Figure_2_figure_supplement_3.pdf]

Figure 2 - figure supplement 1. 2D line scan analysis method

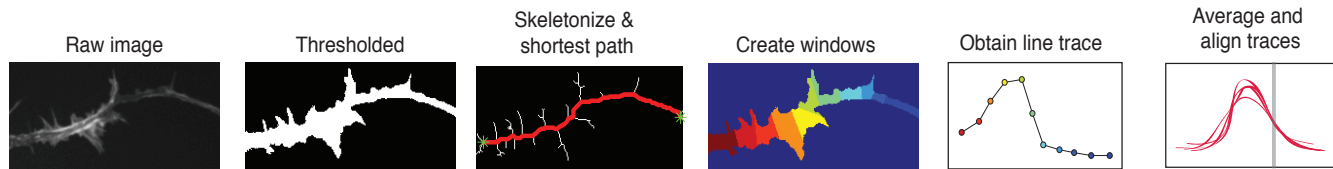

Supplement: supp [file elife-12387-supp-v1.zip › elife_poa_e12387_Figure_2_figure_supplement_1.pdf]
